# Supplementary figures and images for: Mechanochemical synthesis of Ba-doped BiCuSeO oxyselenides: influence of processing conditions on phase formation
Source: Royal Society of Chemistry journal article supplement (doi:10.1039/d5mr00056d), 2025-10-29

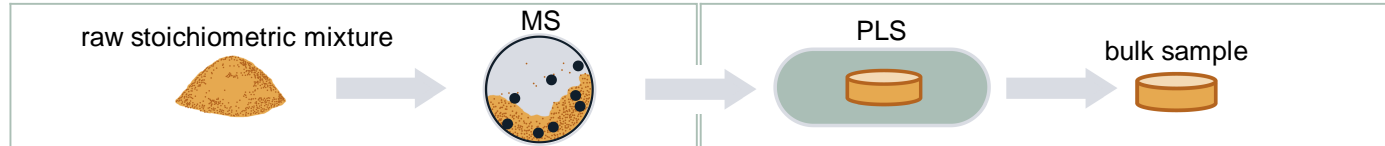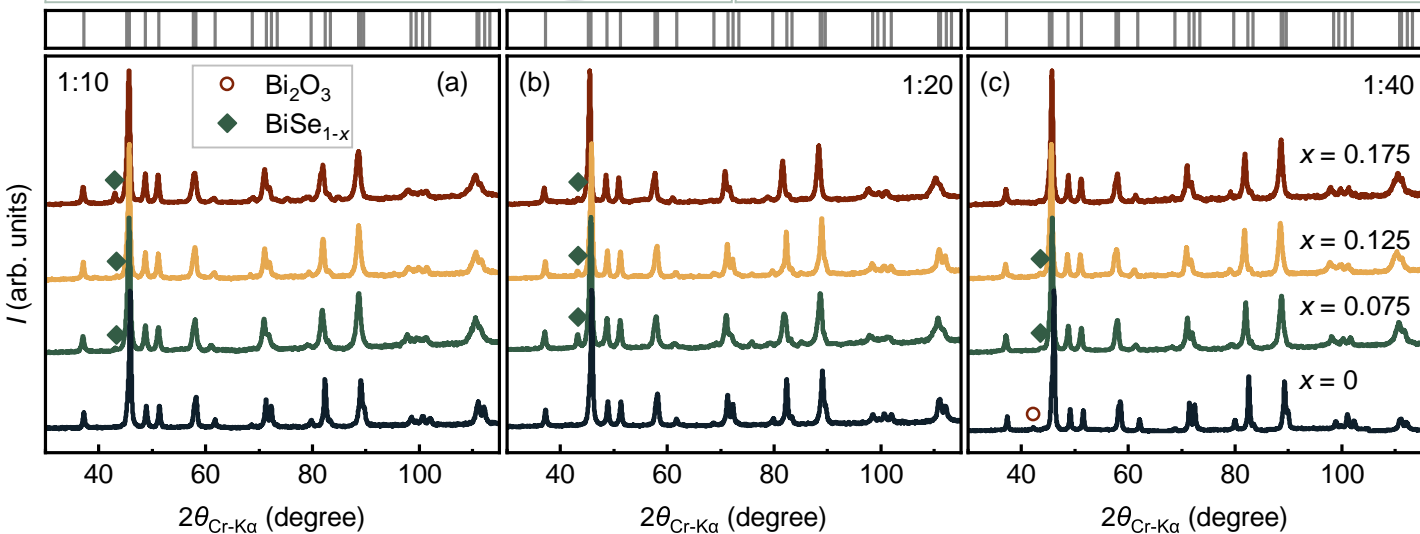

Supplement: d5mr00056d1.zip [file Fig.S1 XRD (HBM-PLS).pdf › figures SI/Fig.S1 XRD (HBM-PLS).pdf]

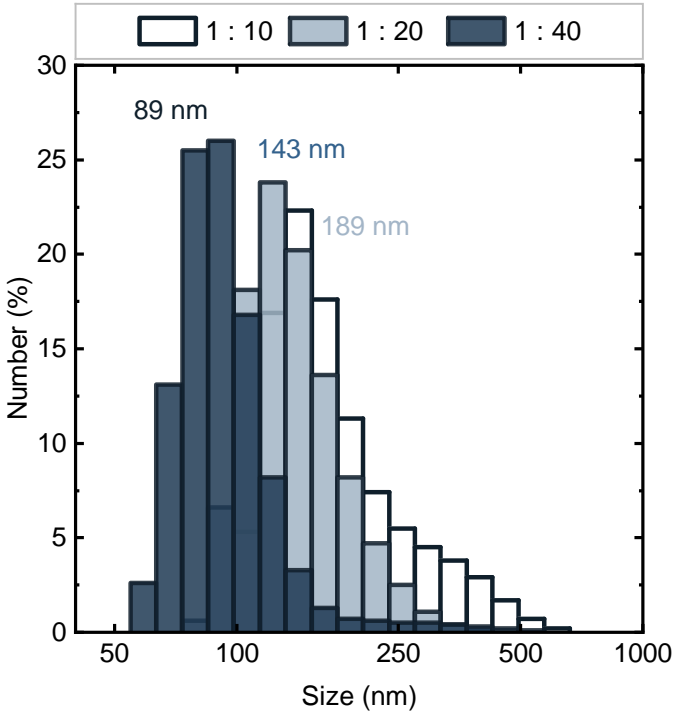

Supplement: d5mr00056d1.zip [file Fig.S2 DLS.pdf › figures SI/Fig.S2 DLS.pdf]

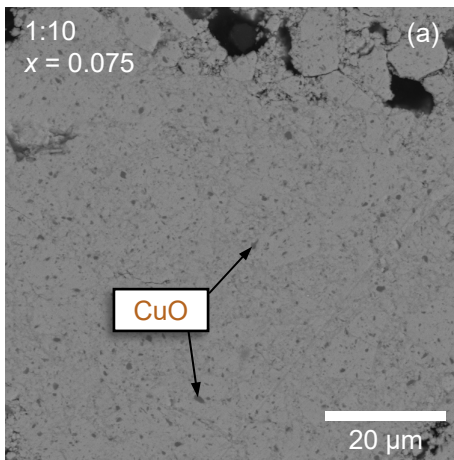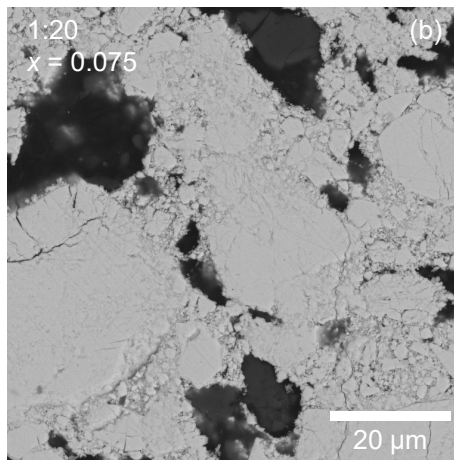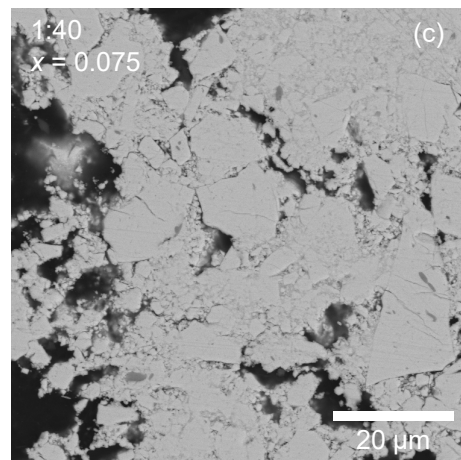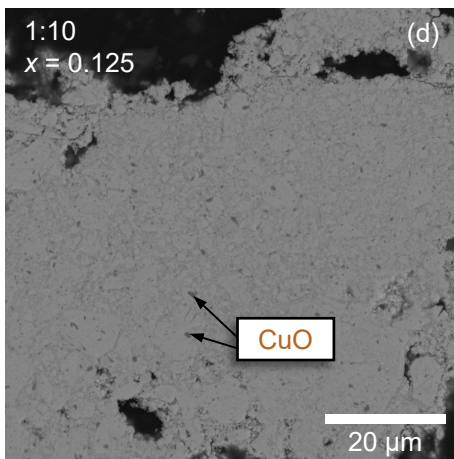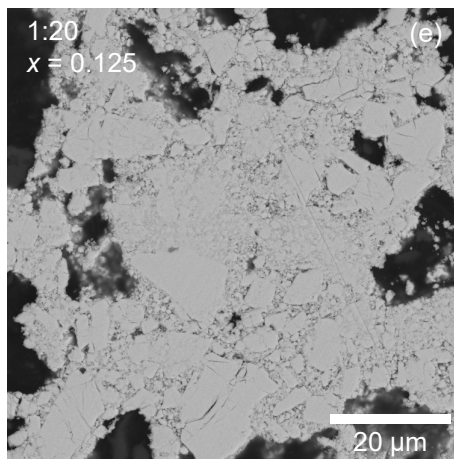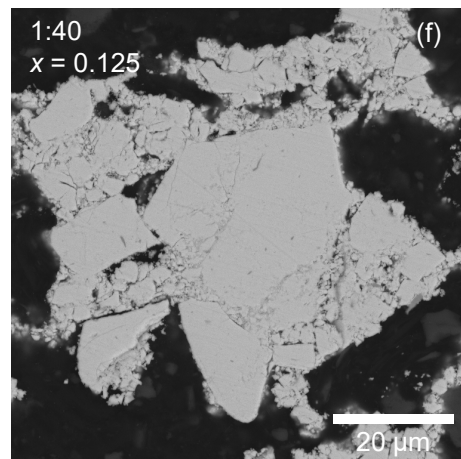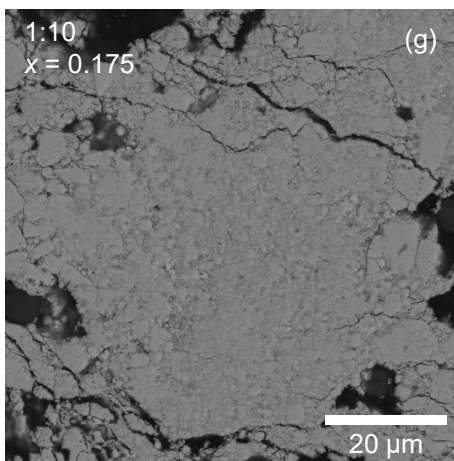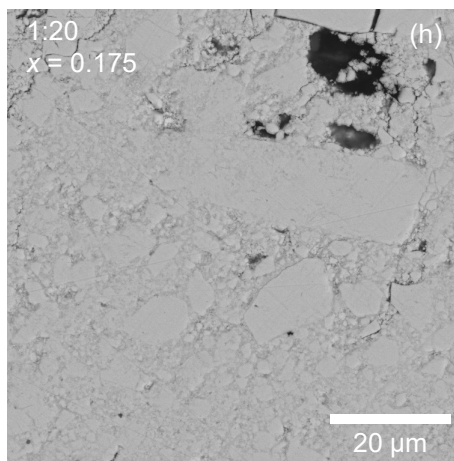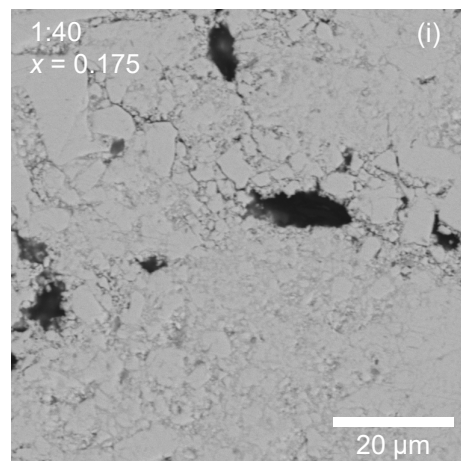

Supplement: d5mr00056d1.zip [file Fig.S3 SEMp.pdf › figures SI/Fig.S3 SEMp.pdf]

1:10

5  $\mu\text{m}$

1:20

5  $\mu\text{m}$

1:40

5  $\mu\text{m}$

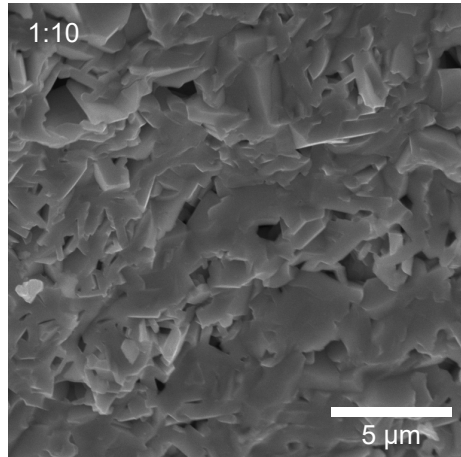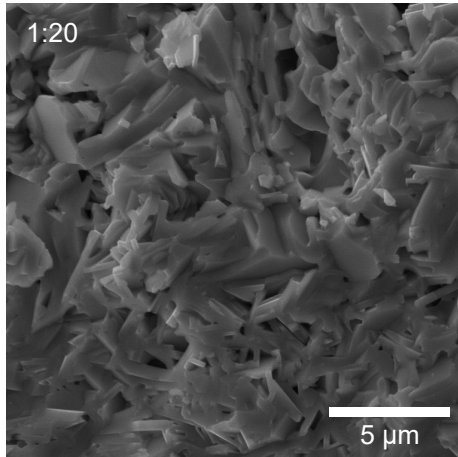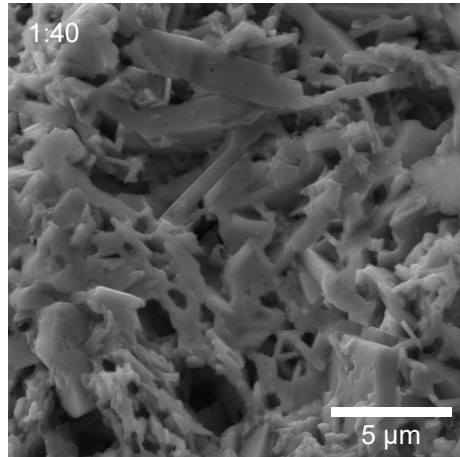

Supplement: d5mr00056d1.zip [file Fig.S4 SEMf.pdf › figures SI/Fig.S4 SEMf.pdf]

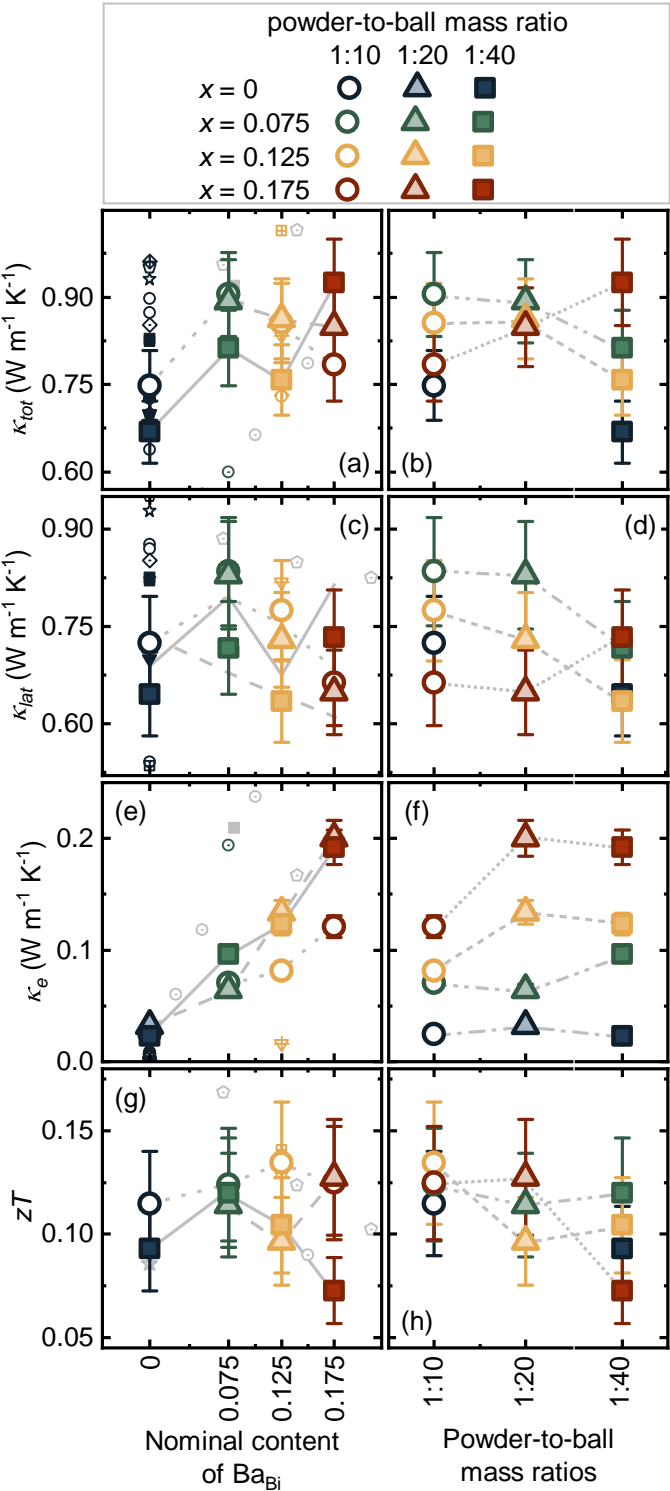

Supplement: d5mr00056d1.zip [file Fig.S5 TE.pdf › figures SI/Fig.S5 TE.pdf]
